## **A Unitary Mechanism Underlies Adaptation to Both Local and Global Environmental Statistics in Time Perception**

Tianhe Wang<sup>1,2\*</sup>, Yingrui Luo<sup>1</sup>, Richard B. Ivry<sup>2</sup>, Jonathan S. Tsay<sup>2</sup>, Ernst Pöppel<sup>1,3</sup>, and Yan Bao<sup>1,3,4\*</sup>

1 School of Psychological and Cognitive Sciences, Peking University, Beijing, China;

2 Department of Psychology and Helen Wills Neuroscience Institute, University of California Berkeley, Berkeley, USA;

3 Institute of Medical Psychology, Ludwig Maximilian University, Munich, Germany,

4 Beijing Key Laboratory of Behavior and Mental Health, Peking University, Beijing, China

### **Co-corresponding authors (\*):**

Tianhe Wang ([tianhewang@berkeley.edu](mailto:tianhewang@berkeley.edu))

Yan Bao ([baoyan@pku.edu.cn](mailto:baoyan@pku.edu.cn))

1    **Abstract**

2    Our sense of the passage of time flexibly adapts to the statistical properties of the temporal context.  
3    Humans and non-human species exhibit a perceptual bias towards the mean of durations previously  
4    observed as well as serial dependence, a perceptual bias towards the duration of recently processed  
5    events. Here we asked whether those two phenomena arise from a unitary mechanism or reflect the  
6    operation of two distinct systems that adapt separately to the global and local statistics of the  
7    environment. We employed a set of duration reproduction tasks in which the target duration was sampled  
8    from distributions with different variances and means. The central tendency and serial dependence biases  
9    were jointly modulated by the range and the variance of the prior. These effects were well-captured by a  
10   unitary mechanism model in which temporal expectancies are updated after each trial based on  
11   perceptual observations. Alternative models that assume separate mechanisms for global and local  
12   contextual effects failed to capture the empirical results.

13

14   **Teaser**

15   Time perception of humans is shaped by a common mechanism that is sensitive to short-term and long-  
16   term environmental changes.

## 17 **Introduction**

18 The internal representation of temporal information is essential for a wide range of cognitive functions,  
19 from anticipating future events to controlling movements (1–3). To improve the precision of temporal  
20 perception, the timing system flexibly adapts to the statistical properties of the current context (4, 5). For  
21 example, when presented with a set of durations in a perception task, participants have a strong tendency  
22 to overestimate relatively short durations and underestimate relatively long durations. Thus, the  
23 perceived duration is biased toward the mean of the set (4, 6–9), a phenomenon known as the “central  
24 tendency effect.” This effect indicates that temporal perception is sensitive to the global temporal  
25 context.

26  
27 It has also been shown that temporal perception can adapt on a rapid timescale. Participants’ perception  
28 of the current duration is attracted toward the duration of the previous stimulus(10–12). That is, the  
29 duration is perceived to be longer after a relatively long duration stimulus compared to a relatively short  
30 duration stimulus. This phenomenon, known as serial dependence, suggests that the perceptual system  
31 is also sensitive to the local statistics of the environment (13, 14).

32  
33 Central tendency and serial dependence effects have been observed across a wide range of perceptual  
34 tasks(13, 15–19), indicating that they reflect general principles of how the perception system adapts to  
35 the statistics of the environment. Both phenomena can be explained under a Bayesian framework. On the  
36 one hand, the observers appear to construct a relatively stable global prior that reflects the distribution  
37 of the stimulus set (6, 20, 21). Following Bayesian integration, the current perception is biased toward the  
38 mean of the global prior, the central tendency effect. On the other hand, the observer also appears to  
39 build a temporal expectancy based on the most recent stimulus, inducing a bias in judging the duration of  
40 the current stimulus towards recently experienced stimuli, the serial dependence effect (22).

41  
42 Although the central tendency and serial dependence effects describe two ways in which context can  
43 influence behavior, it remains unclear whether they reflect the operation of a unitary process or two  
44 separate, adaptive processes. From a unitary view, the perceptual system continuously updates the global  
45 prior based on new observations, and the trial-by-trial updating of the global prior could influence the  
46 subsequent perception, giving rise to serial dependence(10, 11, 23). Alternatively, there may be two  
47 adaptive systems that operate on different timescales in response to environmental statistics, building up  
48 global *and* local priors that give rise to central tendency and serial dependence, respectively.

49

50 To arbitrate between these hypotheses, we used a temporal reproduction task (6, 24–26) in which  
51 participants reproduce an interval specified by a visual stimulus. Across conditions, we manipulated the  
52 global distribution by sampling the target durations from different temporal distributions. If serial  
53 dependence and central tendency arise from a shared mechanism, the magnitude of the serial  
54 dependence effect would be impacted by the global temporal distribution. Alternatively, if serial  
55 dependence and central tendency arise from distinct mechanisms, the magnitude of the serial  
56 dependence effect would remain invariant across a wide range of global temporal distributions. We  
57 formalized these hypotheses and compared the predictions of these computational models with the  
58 empirical results. By combining our behavioral experiments and model-based analyses, we sought to  
59 unravel the computational mechanisms underlying the influence of context on temporal perception.

60

## 61 **Results**

### 62 *Serial dependence in time perception is attractive and non-linear*

63 The central tendency effect in temporal perception has been shown in many experimental contexts (4, 6–  
64 9). In contrast, the serial dependence effect has not been well established in timing. This motivated us to  
65 begin this project by examining serial dependence in a widely employed temporal reproduction task, the  
66 “ready-set-go” task (6). Participants observed a pair of visual events that defined a target interval (“Ready”  
67 and “Set”) and then made a single button press (“Go”), attempting to produce an interval between the  
68 Set and Go signals that reproduced the target interval (Fig. 1a). The target durations were randomly  
69 sampled from a uniform distribution that ranged from 500 to 900ms.

70

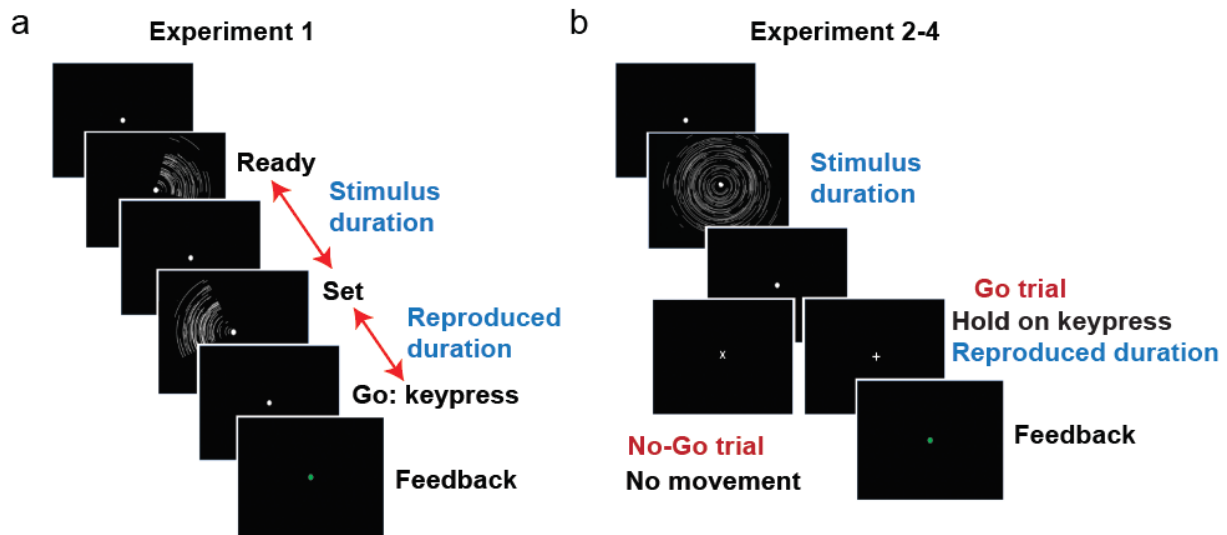

71  
72 Figure 1. Trial and task structure. (a) The stimulus sequence used in **Experiment 1** (“ready-set-go” task). Two  
73 100-ms stimuli flashed in sequence, signifying first a “Ready” signal and then a “Set” signal; the target duration  
74 was the interval between the onset times of the “Ready” and “Set” signals. Participants were instructed to  
75 press the space bar to reproduce the temporal interval after the “Set” signal. Performance feedback was  
76 conveyed for 50 ms via the color of the fixation cross (green = correct; red = incorrect). (b) The stimulus  
77 sequence used in **Experiments 2-4**. We used a duration reproduction task including both go and no-Go trials.  
78 A ripple-shaped stimulus was presented for a fixed duration denoting the temporal interval. After a 300 ms  
79 interval, the fixation point became either a “+” sign or “x” sign, signaling either a “go” or “no-go” trial,  
80 respectively. In Go trials, participants reproduced the temporal interval by holding down a key. When the key  
81 was released, the fixation point turned to a grey circle signaling the end of the trial. In the no-Go trial,  
82 participants were asked to withhold any movement and fixate until the “x” switched to a grey circle after  
83 700ms.

84  
85 The reproduced durations exhibited robust regression towards the mean (Fig. 2a), replicating the central  
86 tendency effect seen in previous studies (10, 25, 27). Quantitatively, the slope of the reproduced duration  
87 to the target duration was significantly smaller than one ( $0.65 \pm 0.20$ ;  $t(11) = -6.08$ ;  $p < 0.001$ , Fig S1a). To  
88 examine serial dependence, we first calculated a “deviation” index, the difference between the  
89 reproduction of a target duration on a given trial and the individual’s mean reproduction to that target  
90 duration across all trials (see Fig. 2a). The serial dependence effect is calculated by the change in the  
91 deviation index as a function of the difference between the previous and the current target durations.

92 This method minimizes potential artifacts in the serial dependence function that may be induced by  
 93 regression to the mean and reproduction biases (28, 29).

94  
 95

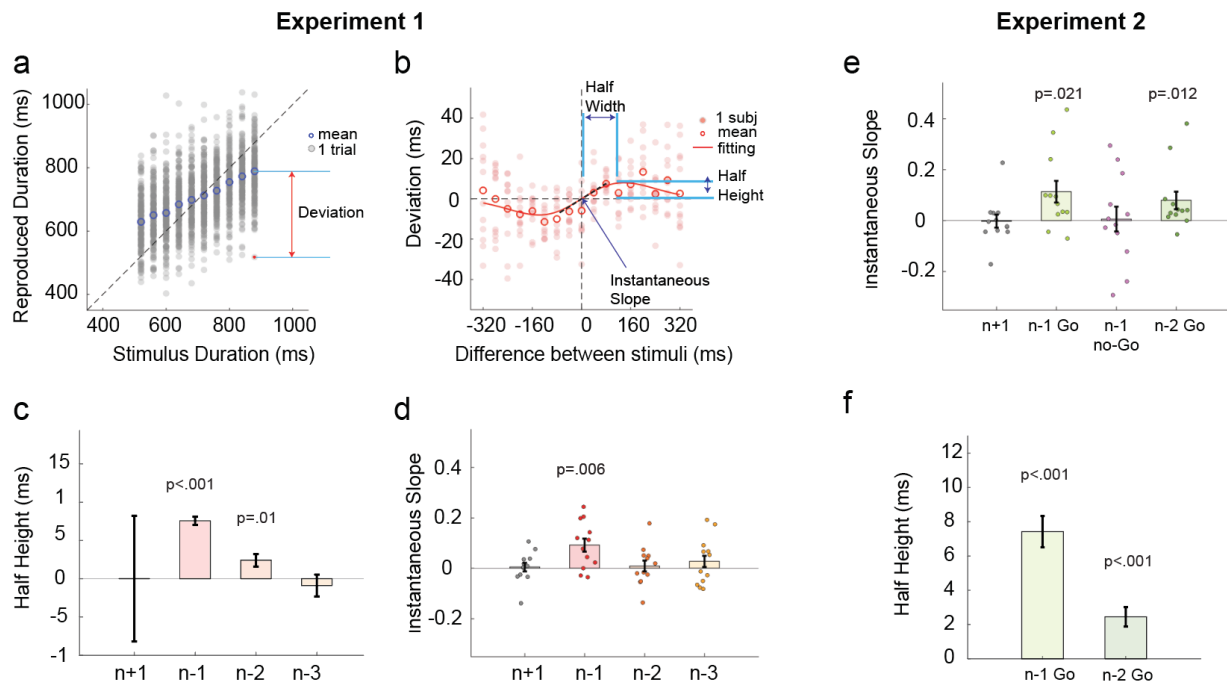

96  
 97 Figure 2. Serial dependence in duration reproduction. **Experiment 1:** (a) Reproduced durations of a  
 98 representative participant. Grey dots represent the reproduced duration of each trial. The blue circle  
 99 represents the participant's mean reproduced duration for each target duration. (b) Serial dependence is  
 100 evident in the non-linear relationship between the deviation index, the current reproduced duration minus the  
 101 mean reproduced duration, as a function of the temporal difference between the previous target duration and  
 102 the current target duration (positive values indicate the previous target was longer). Filled dots denote  
 103 individual participants. Empty circles denote the mean of all 12 participants. The red solid line represents the  
 104 best-fitted Derivative of Gaussian (DoG) model at the group level. (c) Half-height of the best-fitted DoG in  
 105 Experiment 1. Error bars represent an estimate of the standard error obtained from jackknife resampling. (d)  
 106 Instantaneous slope obtained from the fitted DoG curve for trials n-1, n-2, n-3, and n+1 trials. **Experiment 2:**  
 107 (e) Instantaneous slope obtained from the fitted DoG curve with respect to n-1 Go, n-1 no-Go trials, n-2 Go  
 108 trial (when n-1 is no-Go trials), and n+1 (control condition). (f) Half-height of the best-fitted DoG for trials n-1  
 109 and n-2.

110

111 We found that the deviation is biased towards the previous stimulus (Fig. 2b): When the target duration  
112 on trial n-1 was longer than the stimulus on trial n, the reproduced duration tended to be longer than  
113 average, and vice-versa. This indicates that the reproduction on the current trial is attracted towards the  
114 stimulus duration (or reproduced duration) of the previous trial. Notably, the shape of serial dependence  
115 is non-linear: The attraction effect peaks when the current stimulus differs from the previous stimulus by  
116 approximately 100ms and then falls off when the difference grows larger.

117  
118 This non-linear function is well captured by a derivative of Gaussian (DoG) curve (13, 28). To quantify how  
119 previous stimuli influence the current perception in experiment 1, we fitted a DoG to the function of the  
120 difference between the target duration in trial n and trial 1-back, 2-back, or 3-back, respectively. We used  
121 the instantaneous slope at zero to measure the sign of serial dependence (see Fig. 2b). Positive  
122 instantaneous slopes indicate that the current perception is attracted towards the previous stimulus  
123 duration; negative slopes indicate that the current perception is repelled from the previous stimulus  
124 duration. We found a positive slope when calculating serial dependence based on trial n-1 ( $0.092 \pm 0.094$ ,  
125  $t(11) = 3.39$ ,  $p=0.006$ ; Fig. 2d), but not when the calculation was based on trial n-2 ( $0.009 \pm 0.079$ ,  $t(11) =$   
126  $0.39$ ,  $p=0.70$ ) or n-3 ( $0.028 \pm 0.095$ ,  $t(11) = 1.00$ ,  $p=0.34$ ). To better estimate the magnitude of the serial  
127 dependence effect in response to the previous stimuli, we fit a DoG at the group level. The DoG provided  
128 a good fit (Fig. 2b), outperforming the null-model ( $\Delta AIC_n = -46.3 \pm 7.7$ ) and linear-model ( $\Delta AIC_l = -18.6 \pm$   
129  $4.6$ ) for the trial n-1 function. The half-height of this function is  $7.6 \pm 0.6$ ms, and the half-width is  $95.8 \pm$   
130  $10.1$ ms (Fig. 2c); thus, at its peak, the serial dependence effect is about 8%. When analyzed at the group  
131 level, we also get a significant serial dependence effect from trial n-2 ( $2.4 \pm 0.8$  ms,  $z = 3.00$ ,  $p=0.001$ ), but  
132 not from trial n-3 (Fig. 2c), indicating there might be a weak attractive effect that is not evident in the  
133 instantaneous slopes calculated at the individual level. We return to this issue below.

134

### 135 *Serial dependence mainly originates from the temporal reproduction*

136 In Experiment 2, we asked whether the serial dependence effect originates from temporal perception or  
137 temporal reproduction. To test this, we included No-Go trials in which participants were instructed not to  
138 respond. Temporal reproductions following Go trials could reflect biases arising from processes associated  
139 only with perception, only with motor production, or both. In contrast, temporal reproductions following  
140 No-Go trials should only be influenced by a perceptual bias. Importantly, the Go/No-Go signal was only  
141 presented after the target duration, ensuring that participants encoded the target duration on both Go  
142 and No-Go trials (Fig. 1b).

143

144 In trials immediately following Go trials, we replicated the serial dependence effect observed in  
145 experiment 1 (instantaneous slope:  $0.114 \pm 0.042$ ; Wilcoxon test:  $z = 2.03$ ,  $p = 0.021$ ; Fig. 2e) with a half-  
146 height of  $7.4 \pm 0.9$ ms (Fig. 2f) and half-width of  $111.0 \pm 15.6$ ms (Fig S3a). In contrast, we did not find a  
147 serial dependence effect from the previous stimulus following a No-Go trial (instantaneous slope:  $0.006 \pm$   
148  $0.049$ ; Wilcoxon test:  $z = 0.01$ ,  $p = 0.97$ ; Fig. 2e; Fig S3b). This dissociation suggests that serial dependence  
149 in timing mainly arises from sequential effects associated with temporal reproduction, not temporal  
150 perception. Consistent with this notion, when we examined trial triplets composed of Go-NoGo-Go trials,  
151 we found a serial dependence effect on the second Go trial towards the first Go trial (rather than the  
152 intervening NoGo trial; instantaneous slope,  $0.080 \pm 0.034$ , Wilcoxon test:  $z = 2.25$ ,  $p=0.012$ ; Fig. 2e-f; Fig  
153 S3c).

154

#### 155 *Modeling central tendency and serial dependence*

156 Having established robust signatures of the central tendency and serial dependence effects, we now ask  
157 whether these two effects are generated by a unitary mechanism or reflect separate mechanisms that are  
158 shaped by global and local statistics, respectively. To test this, we formalized our intuitions into a series  
159 of computational models.

160

161 To explain the central tendency effect, we begin with a Bayesian-least-square model (6) that assumes the  
162 observer's global temporal expectancy is static (i.e., global prior), with bias constrained only by the global  
163 distribution of temporal stimuli (Global-Only model, Fig 3a-b). The observer's temporal estimation on a  
164 given trial is the Bayesian integration of the global prior with the actual target duration (corresponding to  
165 the likelihood in Bayesian theory). As such, the estimated duration of each trial is biased towards the  
166 global prior, giving rise to the central tendency effect (Fig. 4a). However, given that the Global-Only model  
167 uses a fixed prior, the observer's estimate will not be influenced by the local context (e.g., recently  
168 experienced stimuli). That is, the basic Bayesian model cannot account for the serial dependence effect  
169 (Fig. 4b).

170



171

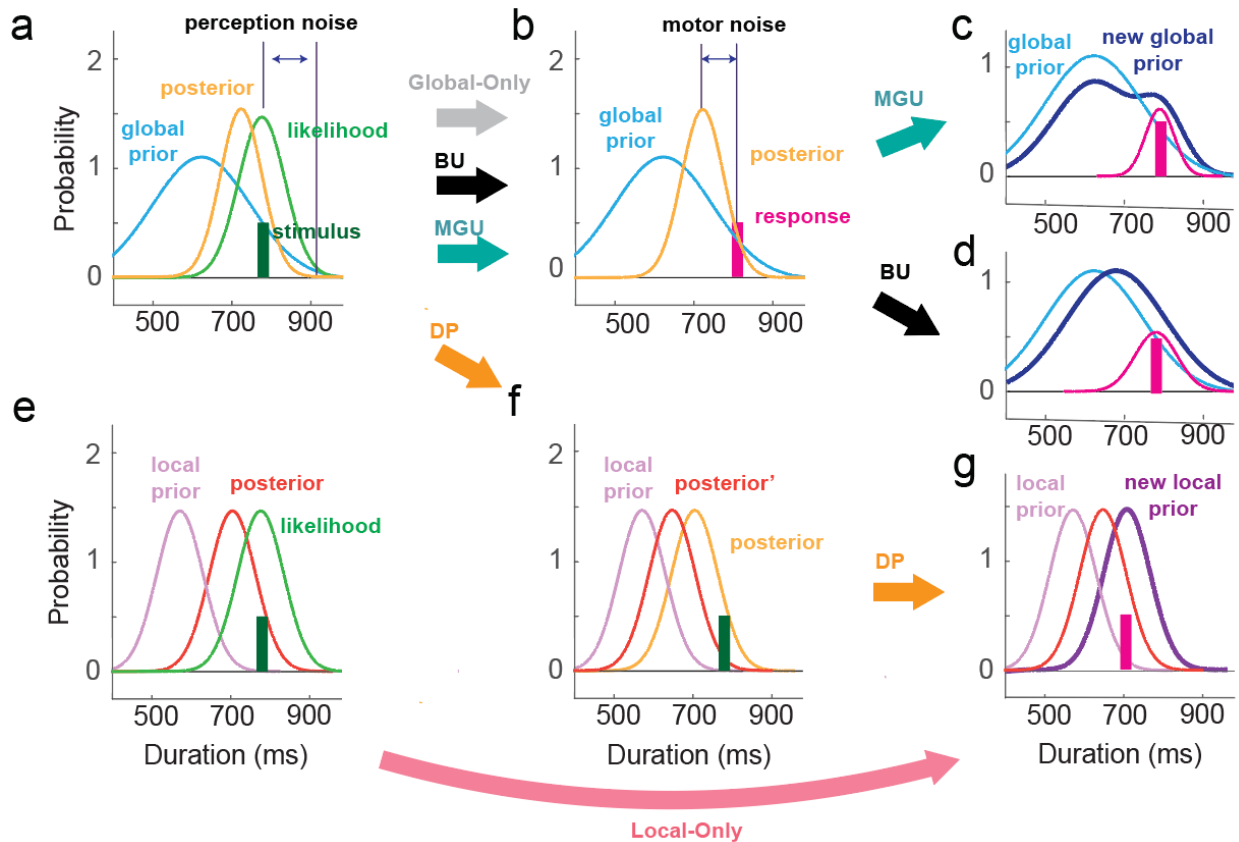

172

173 Figure 3. Schematics of different models. (a) In all of the models, the target duration (green) is represented  
 174 with a normal distribution (likelihood) centered at the target duration with perceptual noise, and the global  
 175 prior (blue) is the distribution of target stimuli. The posterior (yellow) is obtained by multiplying the global prior  
 176 with likelihood. (b) In the Global-only and two global prior updating models (BU/MGU), the final estimate of  
 177 the target duration is the mean of the posterior. The reproduced duration is a normal distribution centered on  
 178 the target duration with motor noise. (c-d) In the BU and MGU models, the observer updates the prior based  
 179 on the reproduced duration after making the motor response. For the MGU (c), a scaled normal distribution  
 180 centered at the reproduced duration was added to the old prior, and the new prior was normalized. For the  
 181 BU (d), the prior is updated with a Kalman filter. (e) For the Local-Only model, the likelihood is integrated with  
 182 the local prior in a non-linear manner, with the weight on the local prior increasing when the likelihood and  
 183 local prior are close and decreasing when they are far. (f) In the DP model, the observer is assumed to hold two  
 184 priors, one global and one local. After the posterior is computed based on the global prior and likelihood, the  
 185 posterior is further integrated with the local prior to generate a second posterior (posterior-2). (g) In the second  
 186 step of the DP and Local-Only models, the new local prior is fully determined by the motor response of the

187 current trial. As with the other three models, the reproduced duration comes from a normal distribution  
 188 centered at the mean of the posterior with motor noise.  
 189

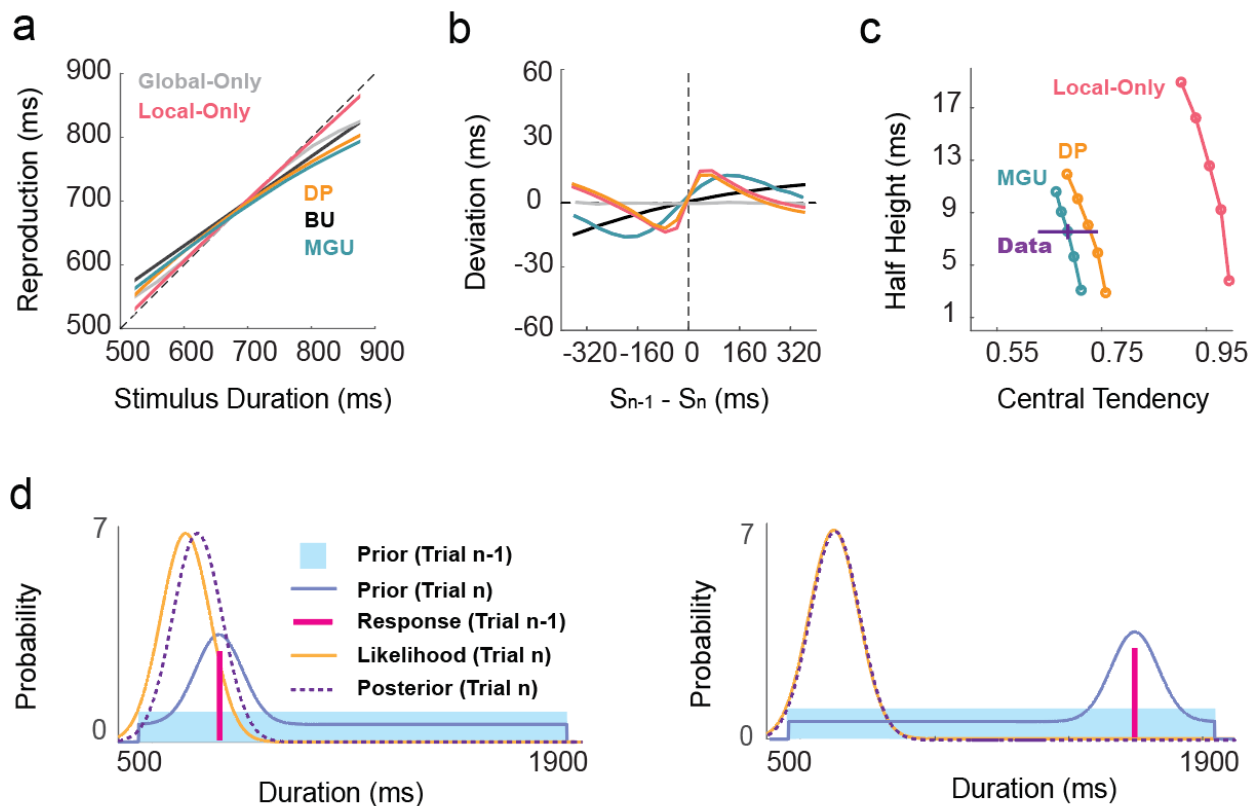

190  
 191 Figure 4. Model simulations. Predicted central tendency (a) and serial dependence (b) effects for the five  
 192 models. (c) Predicted relationship between central tendency and serial dependence for the models. Each line  
 193 is the prediction of one model, and each dot is the prediction with a specific learning rate parameter. The half-  
 194 height increases with the learning rate. The horizontal purple line indicates the mean of the empirical data,  
 195 and the vertical purple bar indicates SE. (d) Illustration of how the MGU model generates a non-linear serial  
 196 dependence. When the current and previous durations are close (left), the previous duration can influence the  
 197 shape of the prior in the range around the current duration and make the current posterior shift more relative  
 198 to the likelihood. In this region, the bias of the posterior increases with the distance between two successive  
 199 stimuli. However, when the current and previous duration are distinct (Right), the previous duration cannot  
 200 influence the shape of the prior around the likelihood, and thus, the attraction effect decreases.

201  
 202 We next considered a unitary mechanism Bayesian Interference model that assumes that the observer  
 203 integrates the likelihood and a local prior based solely on the local context (Local-Only model, Fig 3e, g).

204 The weights of the local prior and likelihood are determined by the difference between distributions  
205 associated with the current sample and recently experienced samples. Specifically, the observer will rely  
206 less on the local prior when it is far away from the likelihood and more on the local prior when it is close  
207 to the likelihood. The Local-Only model can produce a non-linear serial dependence effect (Fig. 4b).  
208 However, this model produces a small central tendency effect (Fig. 4a), inconsistent with the behavioral  
209 results (Fig. 4c). Thus, a local prior by itself is not sufficient to explain adaptive behavior in the current  
210 experiments, indicating that the central tendency effect is not a by-product of serial dependence.

211  
212 We then considered models capable of simultaneously generating serial dependence and central  
213 tendency effects. First, we considered a unitary mechanism model in which the global prior is updated  
214 across trials (Bayes-Updating model). Given that serial dependence is driven by temporal reproduction  
215 (Exp 2), we assume that, following Bayes rule, the prior is updated by integrating a Gaussian centered at  
216 the reproduced duration. Since the priors and posteriors are both Gaussians, the Bayesian integration can  
217 be simplified into a linear weighted sum of the means (i.e., a Kalman filter, Fig. 3d). This model is  
218 mathematically similar to what has been previously described as an internal reference model (10, 11).  
219 While this model predicts a central tendency effect and an attractive serial dependence effect, the  
220 predicted serial dependence function is near-linear (Fig. 4b), inconsistent with the empirical results of  
221 Exps 1-2.

222  
223 To get a non-linear serial dependence function, the prior can be updated in a non-Bayesian manner. We  
224 assume that the brain creates the prior distribution by summing multiple Gaussian distributions with  
225 different weights (Mixed Gaussian Updating model, MGU). When perceiving a new duration, the prior is  
226 updated by adding a Gaussian centered at the reproduced duration to the old prior, followed by  
227 normalization (Fig. 3c). This kind of computation has previously been suggested to account for how  
228 Purkinje cells in the cerebellum adapt to the prior for representing temporal information (26). Since the  
229 global prior is updated locally, the attraction effect from trial n-1 decreases when the duration of the  
230 current stimulus is far from the duration of the n-1 reproduction (Fig. 4d). Thus, this model predicts a non-  
231 linear serial dependence function and serial dependence in accordance with the empirical results in  
232 experiments 1-2 (Fig. 4a-c).

233  
234 In contrast to the unitary mechanism models described above, an alternative way to produce both serial  
235 dependence and central tendency effect is to consider a hybrid model in which the two biases arise from

236 two distinct processes (Dual Priors model, DP). Specifically, the DP model assumes that the current  
237 stimulus (likelihood) is integrated with a static global prior (Fig. 3a), generating serial dependence. The  
238 posterior is then integrated with a local prior (Fig. 3f), inducing non-linear serial dependence. As such, the  
239 Dual Priors model can predict both the central tendency and non-linear serial dependence effects  
240 observed in the data (Fig. 4a-c). Note that these two effects are generated by two mechanisms that adapt  
241 separately to the global and local temporal context.

242  
243 In sum, our computational analyses point to two candidate models that can account for the observed  
244 central tendency and serial dependence effects. These two models diverge in that the MGU model  
245 postulates that central tendency and serial dependence effects arise from a unitary mechanism (non-  
246 linear updates to a global prior). In contrast, the DP model postulates that these two effects arise from  
247 separate mechanisms (a fixed global prior paired with updates to a local prior). In the following sections,  
248 we sought to arbitrate between the MGU and the DP models.

249

#### 250 *Contextual effect on serial dependence*

251 A key difference between the MGU and DP models is that the latter assumes the local prior is mainly  
252 determined by the duration of trial n-1; as such, a serial dependence effect from the n-2 trial will be very  
253 weak. In contrast, the MGU predicts a robust serial dependence effect from trial n-2, given that all (recent)  
254 observations are integrated into the prior. In experiment 1, the group level analysis indicated a positive  
255 serial dependence effect from the n-2 trial. However, this effect was not observed in the individual  
256 analyses of the instantaneous slope values.

257

258 To address this discrepancy, we sought to enhance the serial dependence effect and examine whether it  
259 will be manifest beyond trial n-1. The MGU and DP models both predict that extending the range of target  
260 durations in the test set will enhance the trial n-1 serial dependence effect (Fig 5). By the MGU, the  
261 observer constructs a concentrated prior when the range is limited (Fig 5d right). As such, the prior is  
262 resistant to updating, yielding a weak serial dependence effect. When the range is expanded, the prior  
263 becomes more distributed (Fig 5d left), resulting in a more pronounced local change after each update,  
264 and thus, a stronger serial dependence effect (Fig 5b-c). The DP also predicts this pattern but for a  
265 different reason. Perceptual noise scales with duration (9), a form of Weber's law. Because of this, the  
266 likelihood becomes relatively flat when the range is increased (Fig 5e). This will result in a greater influence  
267 of the previous production and a strengthening of the serial dependence effect (Fig. 5f-g). Importantly, as

268 noted above, the MGU and DP models generate very different predictions regarding concerning a trial n-  
 269 2 serial dependence effect (Fig 6a): The MGU predicts that the serial dependence effect should be  
 270 observed from trial n-2, with a half-height slightly attenuated relative to trial n-1, whereas the DP predicts  
 271 almost no serial dependence effect from trial n-2.

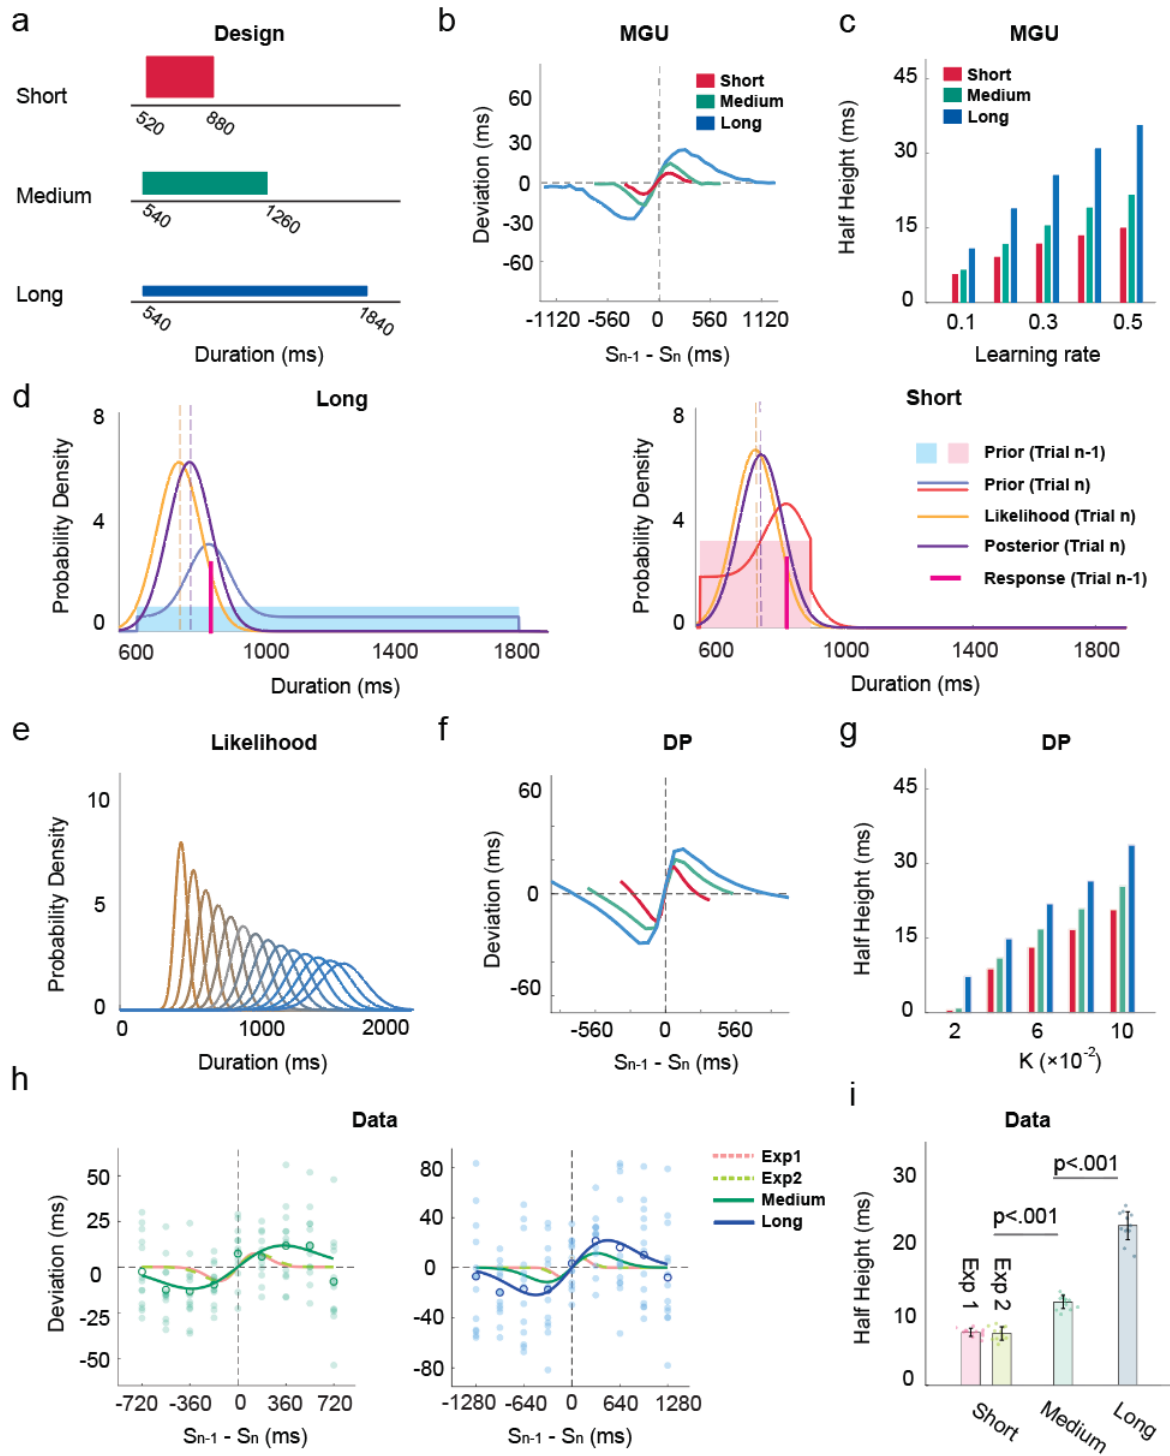

272

273 Figure 5. The range of the target duration distribution influences the serial dependence effect. (a) Distributions  
274 of target durations in different contexts. (b-c) Simulations of the MGU model predict that the half-height of the  
275 serial dependence effect will increase as the range of target duration is increased. (d) In the MGU model,  
276 changing the range of the target durations will impact the width of the prior and, therefore, the serial  
277 dependence effect. (e) In the PD model, since the scalar property in time perception such that the ratio  
278 between the SD and mean is a constant, the likelihood will become flatter as the target duration increases. (f-  
279 g) Simulations of the DP model also predict that the half-height of serial dependence increases substantially as  
280 the range of target duration is increased. (h) Serial dependence effects for trial n-1 in the medium (left) and  
281 long condition (right). Filled dots represent individual participants. Blank circles represent the average of all  
282 participants. The turquoise and blue lines represent the best-fitted DoG in the medium and long conditions,  
283 respectively. The red and green dash lines represent the best-fitted DoG in Experiments 1 and 2, respectively.  
284 (i) Half-height of the best-fitted DoG for serial dependence effect from trial n-1 in Experiments 1, 2, and 3  
285 (medium and long conditions). Each filled dot represents an estimate from jackknife resampling. Error bars  
286 represent standard error.

287

288

289 Given the predictions of the two models, we extended the range of the target durations in experiment 3.  
290 We applied two test sets, one ranging from 520-1260ms (Medium range) and the other from 560-1860ms  
291 (Large range, Fig. 5a). We compared the results with those obtained in Experiment 1, in which the target  
292 durations ranged from 520-880ms (Short range). Extending the range of target duration successfully  
293 enhanced the serial dependence effect from trial n-1. The best-fitted DoG of the medium condition  
294 ( $\Delta AIC_n = -27.5 \pm 4.2$ ;  $\Delta AIC_l = -10.8 \pm 2.2$ ) and long condition ( $\Delta AIC_n = -20.7 \pm 4.4$ ;  $\Delta AIC_l = -10.0 \pm 2.1$ ) had a  
295 higher peak and was broader than that for the short condition (Fig. 5h). Correspondingly, the half-height  
296 increased as the distribution became wider (Fig. 5i; medium:  $11.8 \pm 0.9$  ms; long:  $22.6 \pm 2.0$  ms;  $Z_s > 4.9$ ,  
297  $p_s < 0.001$ ). Similarly, the half-widths also increased as the distribution became wider ( $Z_s > 10.5$ ,  $p_s <$   
298  $0.001$ ), indicating an influence from more distant productions on the previous trial when the test set range  
299 increased.

300

301 The key question in Experiment 3 centers on the trial n-2 data: Will the increase in the magnitude of the  
302 serial dependence effect from trial n-1 be accompanied by a stronger serial dependence effect from non-  
303 adjacent trials? In the analysis of the individual functions, there was a significant positive instantaneous  
304 slope for the trial n-2 data in both the medium and long conditions (Fig 6b). Trial n-3 also showed a

305 tendency for a positive bias, although this did not reach significance. Moreover, fitting the DoG at the  
 306 group level showed a significant positive half-height for the serial dependence function from trial n-2 (Fig  
 307 6c). Thus, the results are consistent with the prediction of the MGU model and fail to support the DP  
 308 model (Fig 6a). Moreover, the MGU is consistent with the central tendency effect in all conditions (short,  
 309 medium, long), further supporting the idea that the process that produces the serial dependence effect  
 310 uses local information to update the prior (Fig S1f).  
 311  
 312

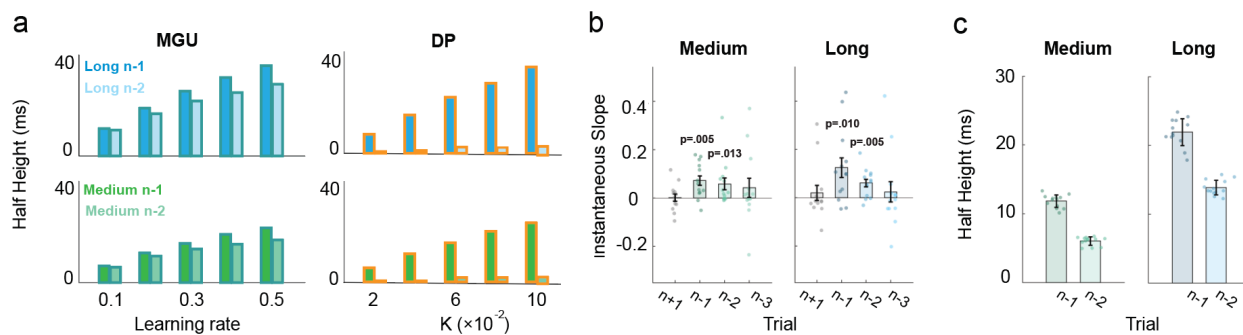

313  
 314 Figure 6. The serial dependence effect becomes stronger when the range of the test distribution increases. (a)  
 315 Simulation of the half-height with the MGU model (left) and the DP model(right). The upper two panels depict  
 316 simulations for the long-range condition, and the lower two panels depict simulations for the medium-range  
 317 condition. Simulations of the MGU model can produce robust serial dependence effects from trial n-2, whereas  
 318 the DP model fails to predict this effect. (b) Instantaneous slope of the DoG-fitting curve for trials n-1, n-2, n-  
 319 3, and n+1 (control condition) in the medium and long conditions. The p-values are with respect to the  
 320 difference from zero. (c) Half-height of the best-fitted DoG for the n-1 and n-2 trials in the medium (left) and  
 321 long (right) conditions.  
 322

### 323 *The variance of prior increases serial dependence*

324 The MGU and DP models also make differential predictions when the variance of the target distribution  
 325 is manipulated (Fig 7a). In Experiment 4, we set the mean of the target set distribution to 900 ms (the  
 326 medium condition of Experiment 3). In one condition, we created a set with low variance (720-1080ms,  
 327 short-900) compared to that used in experiment 3, where the variance was larger (540-1260ms). In the  
 328 second condition, we used a bimodal distribution to increase variance. The GMU predicts that the serial  
 329 dependence effect will be enhanced as the variance of the target distribution is increased (fig. 7b). The  
 330 logic here is similar to that described above in terms of the range of the distribution: Because a low



331 variance test set, by definition, is more concentrated, the effect of trial-by-trial updating of the prior will  
 332 be smaller relative to when the variance is high. In contrast, the DP predicts that the variance of the test  
 333 set will have little effect on serial dependence (Fig. 7c).  
 334  
 335

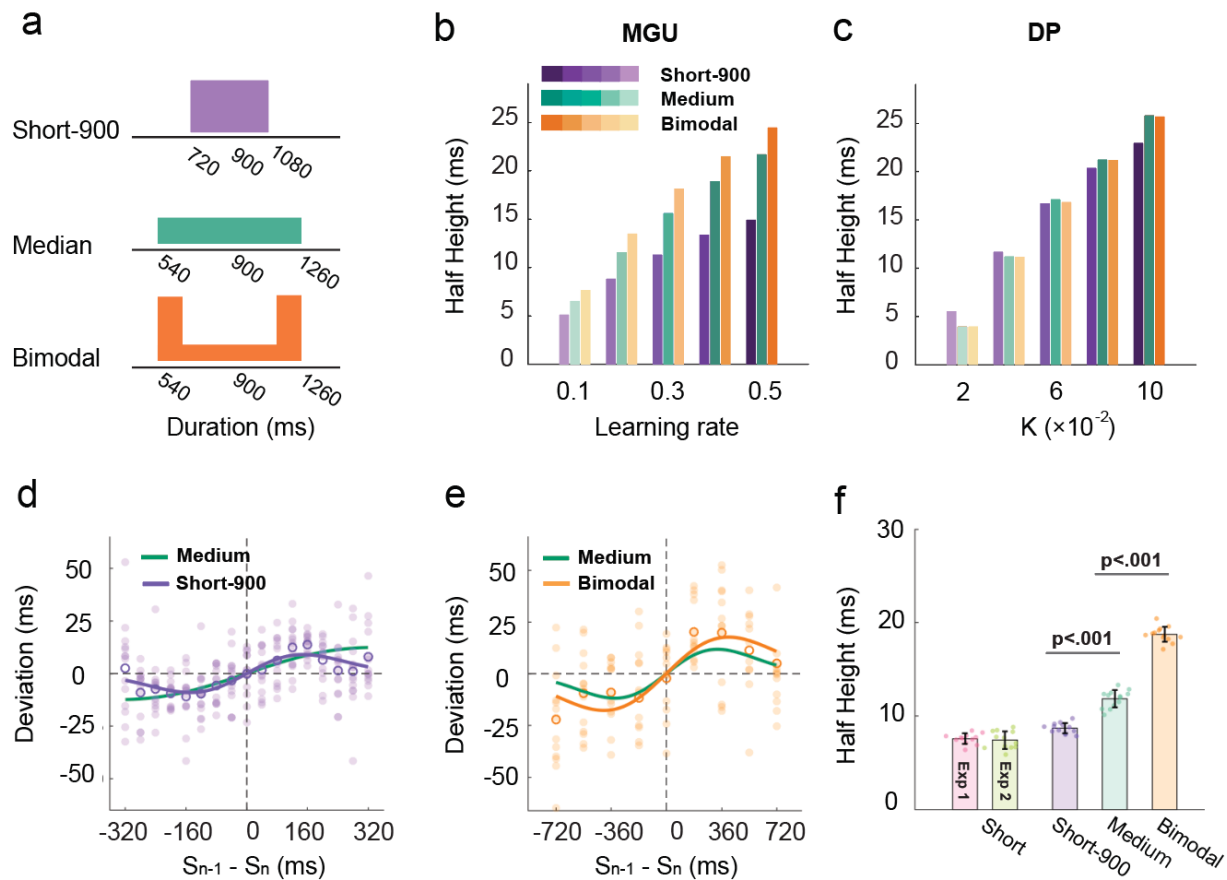

336  
 337 Figure 7. Serial dependence effect becomes stronger when the variance of the test distribution increases. (a)  
 338 Illustration of the distributions of target durations in experiment 4. The short-900 condition (purple) has the  
 339 same mean as the medium condition (turquoise). The bimodal (orange) has the same range as the medium  
 340 condition but has larger variability. (b-c) Predicted half-heights of the DoGs for the different conditions by the  
 341 MGU and the DP models. (d-e) Serial dependence effect for trial  $n-1$  of the short-900 condition (d) and bimodal  
 342 condition (e). Note the scale for the x-axis is different in d and e (and thus, the function for the medium  
 343 condition looks different). Each filled dot represents a participant. The open circles indicate the average across  
 344 participants. The purple, orange, and turquoise lines represent the best-fitted DoG for the short-900, the  
 345 bimodal-medium, and the medium conditions, respectively. Each filled dot represents one participant. Error



346 bars represent standard error. (f) Half-height of the best-fitted DoG for the trial n-1 data in Experiments 1, 2,  
347 and 4. Each filled dot represents an estimate from jackknife resampling. Error bars represent standard error.

348  
349 Consistent with the prediction of the MGU, the serial dependence effect was modulated by the variance  
350 of the test set. For the trial n-1 data, the best-fitted DoG in the bimodal condition ( $\Delta AIC_n = -78.6 \pm 5.6$ ;  
351  $\Delta AIC_l = -18.3 \pm 3.6$ ) yielded the highest and broadest serial dependence function of the three conditions  
352 (Fig. 7e); the short-900 condition (short-900:  $\Delta AIC_n = -48.3 \pm 7.8$ ) showed the lowest and narrowest  
353 function (Fig. 7d). Statistically, the half-heights of the functions increased as the variance of the prior  
354 increased (short-900:  $8.7 \pm 0.6$  ms; medium:  $11.8 \pm 0.9$  ms; bimodal:  $18.7 \pm 0.8$ ms,  $Z_s > 4.2$ ,  $p_s < 0.001$ , Fig.  
355 7f). In the analysis of the individual functions, the serial dependence effect was found in both trial n-1 and  
356 trial n-2 in the bimodal condition, similar to what was found in the medium condition. In the short-900  
357 condition, serial dependence effect was only significant from trial n-1 (Fig S4). In sum, the results provide  
358 additional evidence that serial dependence is enhanced in higher variance test sets.

359  
360 Taken together, the results from Experiments 3 and 4 are consistent with the predictions of the MGU  
361 model, and at odds with the predictions of the DP model. Manipulations of the distribution properties of  
362 the test set indicate that a unitary process gives rise to both the central tendency and serial dependence  
363 effects.

364  
365 **Discussion**

366 The internal representation of duration is context-dependent. Previous work has identified two sources  
367 of contextual bias, a central tendency bias in which the temporal representation is attracted towards the  
368 mean of a global prior, and a serial dependence effect in which recently experienced durations serve as  
369 attractors on the current representation of a stimulus duration (6, 15, 20, 23, 27). In the current study, we  
370 asked whether the central tendency and serial dependence effects arise from a common mechanism or  
371 separate mechanisms.

372  
373 We performed a series of temporal reproduction tasks in which we manipulated the distribution of the  
374 target duration. We observed central tendency and serial dependence effects in all of the experiments.  
375 Although many studies have shown a central tendency in duration perception(6, 20), the presence of a  
376 short-term contextual effect, serial dependency, is less clear. Moreover, the designs and analyses used in  
377 previous work have precluded the analysis of the whole serial dependence function(11, 23). In the current

378 study, we consistently observed a non-linear serial dependence effect in temporal reproduction. By using  
379 a Go/No-Go task(28), we found that the effect was dependent on movement reproduction: There was an  
380 attraction effect from the previous target duration after a Go trial, but no observable effect after a No-Go  
381 trial.

382

383 To determine if long- and short-term contextual effects arise from a single or distinct Bayesian processes,  
384 we compared five computational models. We first examined two unitary models, one with a static global  
385 prior established during the initial phase of the experiment(6), and one with a local prior dictated by  
386 recent experience. Each unitary model could not account for both the observed central tendency and  
387 serial dependence effects. To generate both effects, we considered three more complex models. In one  
388 of these, we assumed that there were two separate mechanisms, one based on a global prior and one  
389 based on a local prior. For the other two models, a unitary mechanism included a process by which the  
390 global prior was continuously updated by recent experience. We rejected the unitary model in which the  
391 prior is updated in a Bayesian optimal manner since it generated a near-linear serial dependence function.  
392 In contrast, simulations of the MGU unitary and DP models yield central tendency and non-linear serial  
393 dependence effects.

394

395 To further explore the viability of the MGU and DP models, we considered predictions of the two models  
396 when we manipulated either the range or variance of the test stimuli. While both models predict that the  
397 amplitude of the serial dependence effect from the preceding trial will increase with the range of the test  
398 stimuli, only the MGU model predicts that this manipulation will also enhance the serial dependence  
399 effect from earlier trials (e.g., n-2). Moreover, the MGU model predicts that the serial dependence effect  
400 will be enhanced when the variance of the test set is increased, even when the mean duration is fixed,  
401 whereas the DP model predicts that the variance of the prior should have negligible influence on serial  
402 dependence. The results showed that, when extending the range of the test set, the serial dependence  
403 effect was enhanced and evident in terms of the context established from the n-2 as well as the n-1  
404 stimulus. Similarly, the serial dependence effect was enhanced when increasing the variance of the test  
405 set. Together, these results provide strong support for the MGU model, indicating that the global bias and  
406 serial dependence effects arise from a unitary mechanism in which a single global prior is continuously  
407 updated after each trial by the reproduced stimulus duration.

408

409 The nonlinearity of the serial dependence function sheds light on how the prior is updated based on recent  
410 experience. Updating could follow a simple Bayesian optimal integration rule with the prior represented  
411 as a Gaussian. While this model generates a serial dependence effect, the shape of the function is  
412 approximately linear (BU, see Fig 4b). To capture a non-linear serial dependence function, we assumed  
413 that the prior is updated by increasing the weight of the Gaussian centered at the recently reproduced  
414 duration. One benefit of representing the prior with a Gaussian mixture model is that it provides a way to  
415 represent the effects of any test set, regardless of its distributional shape. Indeed, previous studies have  
416 also shown that a mixture of Gaussians provides a good fit of the internal prior in duration perception  
417 experiments (26, 30). Here we show that an updating rule based on this assumption can account for the  
418 non-linear serial dependence function as well as how the function will shift when the variance of the test  
419 set is manipulated.

420  
421 As noted above, the serial dependence effect was contingent on the participant having produced a  
422 response; it was markedly attenuated after No-Go trials. In theory, it is possible that this local effect is  
423 reflective of some sort of motor memory, where the current motor reproduction is directly biased by the  
424 previous motor reproduction, with the perceived duration unbiased. However, we think it is more likely  
425 that the serial dependence effect is mediated by perception: A prior of temporal expectation is  
426 constructed from the reproduced duration, and this prior biases the perception of subsequent target  
427 stimuli, which in turn, will be reflected in the next reproduced duration. In support of this idea, several  
428 studies have shown that making a movement of a variable duration influences performance on a  
429 subsequent duration comparison task in which no motor reproduction was made (12, 31, 32).

430  
431 We note that serial dependence effects have been observed in previous visual perception studies of  
432 orientation and position that do not involve motor responses (28, 29, 33). Thus, we do not claim that the  
433 absence of a serial dependence effect in the No-Go condition of Exp 2 should be taken to mean that  
434 movement is a necessary prerequisite. As with all null results, caution is warranted. The design used in  
435 Exp 2 may have been insensitive to capture the contribution of a purely perceptual component to the  
436 prior. Indeed, there is evidence from duration comparison tasks without reproduction of an attractive  
437 sequential effect (11, 34). Follow-up experiments are needed to understand the factors that determine  
438 the weight given to perception and production in forming the prior.

439

440 We recognize that, in evaluating the five models, we assumed that a global prior was established during  
441 the initial phase of the experiment. Obviously, establishing a global prior requires some integration of the  
442 local context as the participant becomes familiar with the stimulus set. We set our initial “training” phase  
443 based on previous studies, which have shown that participants are able to generate a relatively accurate  
444 global prior of the temporal context after about 100 trials (17). One open question is how the prior  
445 updating rate changes as a function of training. In our dynamic models, we assumed that the rate  
446 remained constant over the course of the experiment. However, it is possible that the rate of updating  
447 weakens as the prior becomes more established. Correspondingly, the serial dependence effect might  
448 become weaker over time. However, this temporal expectation system might be a rigid system that  
449 recalibrates the environment with an invariant learning rate. This characterization conforms with a  
450 conceptualization of the operation of the cerebellum in sensorimotor adaptation, and the same principles  
451 might apply to duration representation, another function associated with the cerebellum (35, 36). The  
452 data set in the current experiments are insufficient to examine the dynamics of updating, and we see this  
453 as an important issue to be addressed in future studies.

454  
455 In summary, the current study provides new insights into how context influences our sense of duration.  
456 The perception of the duration of a stimulus is sensitive to both the global distribution of the stimulus set  
457 as well as recent experience. Importantly, by examining the central tendency and serial dependence  
458 effects in a joint manner, we observed that these two forms of bias are best explained by a unitary  
459 mechanism in which a global prior is updated in an iterative manner based on each observation. Given  
460 that central tendency and serial dependence effects are ubiquitous in perception tasks (6, 14, 15, 19, 27,  
461 33), the common Bayesian framework developed here may provide a general account of how perceptual  
462 systems adapt to environmental statistics.

463

464

## 465 **Methods**

### 466 **Participants**

467 A total of sixty-four students at Peking University were recruited for the four experiments. All participants  
468 were right-handed with normal or corrected-to-normal vision. In Experiment 1, thirteen participants (8  
469 females, mean age = 21.1, SD  $\pm$  1.0) were recruited for the two 1-hour sessions. One participant did not  
470 return for the second session. In Experiment 2, twelve participants (8 females, mean age = 24.1, SD  $\pm$  4.2)  
471 completed two 1.5-hour sessions. In Experiments 3 and 4, 52 participants (15 females, mean age = 21.1,

472 SD  $\pm$  2.1, 13 for each of the four conditions) completed a 1-hour experiment. Participants received \$10/h  
473 as compensation. All experimental protocols were approved by the institutional review board of the  
474 School of Psychological and Cognitive Sciences, Peking University, and carried out according to the  
475 approved guidelines. Written informed consent was obtained from all participants.

476

477 Testing was conducted in a dark room, and the stimuli were presented on a 27-inch LCD monitor  
478 (resolution of 1,024  $\times$  768), viewed from a distance of 65 cm. The computer used a Windows 8 operating  
479 system with a refresh rate of 100 Hz. The experiment was written in MATLAB (Mathworks, Natick, MA;  
480 Psychophysics Toolbox Brainard, 1997;(37)).

481

482 Procedure and design

483 Experiment 1

484 We used a “ready-set-go” time-reproduction task(6) (Fig. 1a) to measure global (central tendency effect)  
485 and local (serial dependence effect) biases. Each trial started with the presentation of a gray fixation point  
486 (0.5 degrees diameter) at the center of the screen. After a random interval ranging from 0.7-1.2 s (drawn  
487 from an exponential distribution), two 100-ms stimuli flashed in sequence, with the first serving as the  
488 “Ready” signal and the second serving as the “Set” signal. The visual stimulus was either a grey ripple-  
489 shaped arc (Exp 1) or a circle (Exps 2-4) (see Fig 1) with a radius of around 12 degrees.

490

491 The interval between the onset times of the “Ready” and “Set” signals defined the target interval.  
492 Participants were instructed to press the space bar (“Go”) to reproduce the target interval, with the onset  
493 of the reproduction interval defined by the “Set” stimulus. After the keypress, performance feedback was  
494 provided for 50 ms via a change in the color of the fixation point: Green indicated that the reproduced  
495 duration was within an acceptable window, and red indicated that the reproduced duration fell outside  
496 this window. The criterion window was continuously adapted based on the participant's performance  
497 such that green and red appeared with roughly equal probability. The feedback was provided to  
498 encourage the participant to pay attention to the task. It was relatively uninformative (e.g., did not provide  
499 signed information) because we did not want participants to correct their timing based on the feedback.

500

501 Each participant completed two sessions, with each session composed of 10 blocks of 200 trials (2000  
502 trials total). A one-minute break was provided every two blocks. The stimulus set consisted of ten target

503 durations, ranging from 520 to 880 ms (step size of 40 ms). Target duration was randomized within a block  
504 of 100 trials with the constraint that each duration was presented 10 times.

505

### 506 Experiment 2

507 The goal of Experiment 2 was to evaluate whether the source of the serial dependence effect is  
508 perceptual, motoric, or a combination of both. To test this, we included Go and No-Go trials in a duration  
509 reproduction task.

510

511 After a random interval ranging from 0.7-1.2s (following an exponential distribution), a ripple-shaped  
512 stimulus was presented for the target duration. The spatial distribution of brightness was constant, but  
513 the actual shape varied across trials to avoid repetition suppression effects (38–41). Crucially, 300 ms after  
514 the offset of the target stimulus, the fixation point changed to either a "+" or "x", with these symbols  
515 indicating that the current trial was a Go or No-Go trial, respectively. In Go trials, participants were  
516 instructed to depress the space bar for a duration that matched the target duration. The fixation point  
517 changed back to a grey circle right after the release of the keypress. On No-Go trials, participants were  
518 asked to fixate without movement until the "x" disappeared. On these trials, the grey circle reappeared  
519 after 700ms, indicating the start of a new trial. Note that no time constraints were imposed on Go trials;  
520 thus, we anticipated there would be few errors of omission (Go trials) or commission (No-Go trials).  
521 However, we assumed that the target duration would be similarly encoded on all trials since the "+" or  
522 "x" did not appear until after the target stimulus.

523

524 There were five target durations (540, 620, 700, 780, and 860 ms), with each target duration repeated on  
525 360 trials. For each target duration, 60% were Go trials and 40% were No-Go trials. Target duration and  
526 response requirements were randomized within blocks of 180 trials. Each session consisted of five blocks  
527 (1800 total trials across the two sessions), with a one-minute break between every two blocks.

528

### 529 Experiment 3

530 The goal of Experiment 3 was to assess how the serial dependence effect is impacted by the range of the  
531 stimulus set. To test this, we employed two new stimulus sets: A medium condition (540, 720, 900, 1080,  
532 1260ms) and a long condition (560, 880, 1200, 1520, 1840ms). We compared performance with these sets  
533 to the data from Experiments 1-2 (where the range was shorter, 540-860ms). The procedure in  
534 Experiment 3 was identical to that of Experiment 2, except that only Go trials were included. There were

535 five blocks of 150/120 trials (medium/long condition), resulting in a total of 750 trials for the medium  
536 condition and 600 trials for the long condition. The difference was imposed to keep all sessions within one  
537 hour. The target duration was selected at random on each trial with the constraint that each condition  
538 occurred an equal number of times within each block.

539

#### 540 Experiment 4

541 The goal of Experiment 4 was to examine how the serial dependence effect is impacted by the variability  
542 of the stimulus set. To test this, we employed two new stimulus sets. For the short-900 condition, the test  
543 set ranged from 720-1080 ms (steps of 40 ms, mean = 900 ms). This group has the same mean as the  
544 medium condition in Experiment 3 but with a shorter range (equal to that used in Exps 1 and 2). In this  
545 way, the variance of the test set is smaller than that of the medium condition. For the bimodal-medium  
546 condition, the test values were the same as that used in the medium condition of Experiment 3, but the  
547 extreme values (540 ms and 1160 ms) were presented three times as often as the other three test  
548 durations (670, 900, 1030ms). The short-900 condition included 10 blocks of 200 trials, and the bimodal  
549 condition included 10 blocks of 135 trials.

550

#### 551 Data analysis.

552 The logic of these experiments is predicated on the assumption that participants are familiar with the  
553 temporal context. Given this, the first block of each experiment (approx. 7-10 minutes of data collection)  
554 was treated as the familiarization phase and not included in the analysis. In addition, reproduced  
555 durations shorter than 0.3 s or longer than 1.5s (2.5s for Experiments 3-4) were considered outliers and  
556 excluded from the analyses (less than 0.1 % of trials).

557

558 The central tendency bias or regression to the mean was quantified as the regression coefficient between  
559 the reproduced durations and the target durations. To analyze the serial dependence effect, we used a  
560 “deviation” index. For each individual, the average reproduced duration was calculated for each target  
561 duration. The deviation was defined as the reproduced duration for a given trial minus the mean  
562 reproduced duration of all trials with that target duration (28, 29). Positive values indicate that the  
563 reproduced duration for the present trial was longer than the average reproduction for that target and  
564 negative values indicate that the reproduced duration was less than the average reproduction.

565

566 To quantify the magnitude of the serial dependence effect, a simplified DoG curve was fit to describe the  
567 deviation index as a function of the difference between the current target duration and reference  
568 duration, where the reference could be the target duration of the previous trial (n-1), two trials back (n-  
569 2), etc., as well as following trial (n+1, serving as a baseline):

$$570 \quad y = abcxe^{-(bx)^2},$$

571 where  $y$  is the deviation,  $x$  is the relative target duration of the previous trial,  $a$  is half the peak-to-trough  
572 amplitude of the derivative-of-Gaussian,  $b$  scales the width of the Gaussian derivative, and  $c$  is a constant,  
573  $\sqrt{2}/e^{-0.5}$ , which scales the curve to make the  $a$  parameter equal to the peak amplitude. As a measure of  
574 serial dependence, we report half the peak-to-trough amplitude (half-height) and half the width of the  
575 best-fitted derivative of a Gaussian. A positive value for the  $a$  parameter indicates a perceptual bias  
576 toward the target durations of the previous trials. A negative value for the  $a$  parameter indicates a  
577 perceptual bias away from the target durations of the previous trials.

578  
579 We fit the Gaussian derivative at the group and individual level using constrained nonlinear minimization  
580 of the residual sum of squares. Jackknife resampling was applied to estimate the variation of the  
581 parameters for the group-level fit, where each participant was systematically left out from the pooled  
582 sample. The standard deviation of those estimates represented the standard error of the parameter at  
583 the group level. The half-height and half-width of the best-fitted DoG were compared between groups  
584 with a t-test, where the t-value was computed with the mean and the variance of the parameters  
585 estimated from the jackknife resampling procedure. Bonferroni correction was applied for multiple  
586 comparisons. To test the goodness-of-fit of our model, we computed the  $\Delta AIC$  for the DoG model  
587 compared with either a non-model ( $y = 0$ ,  $\Delta AIC_n$ ) or a linear model ( $y = kx$ ,  $\Delta AIC_l$ ). A negative  $\Delta AIC$  indicates  
588 DoG performed better than the alternative models.

589  
590 To determine the extent of serial dependency, we fitted individual serial dependence functions in which  
591 the reference could be the target duration of the previous trial (n-1), two trials back (n-2), etc. We also  
592 tested the serial dependence function for the n+1 trial. Given that this reference stimulus has not been  
593 experienced, there should be no serial dependence effect here, providing a test of whether the deviation  
594 measure is a valid index to analyze serial dependence. Since individual serial dependence functions do not  
595 always show a strong nonlinearity,  $a$  parameter (half-height) can become unreasonably large. Thus, we  
596 opted to use the instantaneous slope of the DoG at the inflection point ( $abc$ ) when estimating the



597 presence of a serial dependence effect at the individual level. Note that this index measures the sign of  
598 the serial dependence independent of whether or not the function is linear.

599

600 In Experiment 2, the Go trials were sorted into two groups based on whether the reproduced interval on  
601 that trial was preceded by a Go trial or a No-Go trial. We calculated the average reproduced durations  
602 and the deviation using the same protocol as Experiment 1 and then fit DoG functions separately for the  
603 Go/Go trial sequence and the No-Go/Go trial sequence to measure the serial dependence effect from trial  
604 n-1. For each function, we calculated the instantaneous slope of the DoG at the inflection point. Note that  
605 if the serial dependence effect is dependent on a motor response, there should be no serial dependence  
606 effect when the preceding trial was a No-Go trial. For Go trials preceded by a No-Go trial, we also analyzed  
607 the serial dependence effect from n-2 Go trials. Group-level DoG fitting was performed on n-1 and n-2 Go  
608 trials separately to quantify the amplitude of serial dependence.

609

610 One-sample t-tests and paired t-tests were applied at the group level for comparisons. Normality and  
611 equal variance assumptions were assessed prior to the t-tests. The Wilcoxon Sign-rank test was applied  
612 when the normality assumption was violated. Two-tailed P values are reported for all statistic tests, and  
613 the significance level was set as  $p < 0.05$ . All analyses were performed with MATLAB 2018b (The  
614 MathWorks, Natick, MA).

615

616 *Models*

617 To account for central tendency and serial dependence effects, we implemented five Bayesian models:  
618 Two single process models (Global-only, Local-Only), a model with both a static global prior and a local  
619 prior (Dual-prior), and two unitary models that capture how a global prior is dynamically updated by  
620 recent experience (Bayes-Updating & Mix-Gaussian-Updating).

621

622 *Global-Only model*

623 This model is based on a Bayesian observer model that uses a Bayes-Least-square as the mapping rule (6).  
624 We assume that the observer builds up an internal prior,  $\pi(t_s)$  based on the target durations ( $t_s$ ) observed  
625 during an initial exposure phase, and subsequent judgments are made by reference to this static prior.  
626 The likelihood function describes the probability of the perceived duration ( $t_p$ ) given  $t_s$ .

627

$$p(t_p | t_s) = N(t_p | t_s, v_p) \quad [1]$$

628 where  $N(x|m, s)$  represents a normal distribution with mean  $m$  and standard deviation  $s$ , and  $v_p$  scales  
629 the perception noise. The posterior,  $\pi(t_s | t_p)$ , is the product of the prior multiplied by the likelihood  
630 function and appropriately normalized.

$$631 \quad \pi(t_s | t_p) = \frac{p(t_p | t_s) \pi(t_s)}{\int p(t_p | t_s) \pi(t_s) dt_s} \quad [2]$$

632 The loss function,  $l(t_e, t_s)$ , was used to convert the posterior into a single estimate,  $t_e$ , the mean of the  
633 posterior in the present situation.

$$634 \quad l(t_e, t_s) = (t_e - t_s)^2 \quad [3]$$

$$635 \quad t_e = \underset{t_e}{\operatorname{argmin}} [\int l(t_e, t_s) * \pi(t_s | t_p) dt_s] \quad [4]$$

636 The Bayesian observer makes a response based on  $t_e$  :

$$637 \quad p(t_r | t_e) = N(t_r | t_e, v_m) \quad [5]$$

638 where  $t_r$  is the reproduced duration, and  $v_m$  scales the motor noise. Previous studies (6, 9) have shown  
639 that scalar forms of perceptual and motor noise provide a better fit of the behavior compared to when  $v_p$   
640 and  $v_m$  are treated as constants. Thus, we set  $v_p$  as  $n_p * t_s$ , and  $v_m = n_m * t_e$ , where  $n_p$  and  $n_m$  are  
641 constants.

642

643 For this baseline, Global-only model, we simulated the results under the assumption that the prior was  
644 established based on a data set that would be experienced during the first 7-10 minutes of the  
645 experiments, and then remained fixed for the duration of the experiment. We assumed that participants  
646 learn the true distribution of target durations as the prior:

$$647 \quad \pi(t_s) = U(t_s, [500 \text{ ms}, 900 \text{ ms}]) \quad [6]$$

648 where  $U(x, [y, z])$  represents a uniform distribution ranging from  $y$  to  $z$ .

649

650 Local-Only Model

651 To capture the serial dependence effect, we adapted a Bayesian integration model from a previous study  
652 that examined serial dependence in magnitude estimation (22). In the current context, this model  
653 assumes that the observer integrates the previous response ( $t_r$ ) with the current stimulus ( $t_s$ ) when  
654 estimating the duration of the current stimulus:

$$655 \quad t_{e,i} = (1 - W_{i-1})t_{s,i} + W_{i-1}t_{r,i-1} \quad [7]$$

656 where  $t_{e,i}$  and  $t_{s,i}$  indicate the  $t_e$  and  $t_s$  of trial  $i$ , and  $t_{r,i-1}$  is the reproduced duration of trial  $i-1$ .  $W_{i-1}$  is  
 657 the weight the observer assigns to the trial  $n-1$  response when estimating the current duration. Following  
 658 Bayes rule to integrate the two samples dictating the current percept, the observer specifies  $W_{i-1}$  as

$$659 \quad W_{i-1} = \frac{1/\sigma_{i-1}^2}{1/\sigma_i^2 + 1/\sigma_{i-1}^2} = \frac{\sigma_i^2}{\sigma_i^2 + \sigma_{i-1}^2} \quad [8]$$

660 where  $\sigma$  is the variance of the estimate. The weight is influenced by the distance between the two stimuli,

$$661 \quad W_{i-1} = \frac{\sigma_i^2}{\sigma_i^2 + \sigma_{i-1}^2 + (t_{s,i} - t_{s,i-1})^2} \quad [9]$$

662 The variance is assumed to follow a power law.

$$663 \quad \sigma = K t_s^\alpha \quad [10]$$

664 Assuming that time perception follows a scalar rule,  $\alpha = 1$ .  $K$  is a free parameter regulating the behavior  
 665 of the model.

666

667 Dual Prior model

668 We combined the Local-Only and Global-Only models to create a Dual Prior model. It contained two  
 669 Bayesian processes. For the first integration, the observer integrates the current stimulus ( $t_s$ ) with the  
 670 prior  $\pi(t_s)$  to get an estimation  $t_{e'}$ , following Global-Only model (Eq [4]-[7]). The second integration  
 671 estimates  $t_{e,i}$  based on  $t_{r,i-1}$ ,  $t_{e,i'}$  and  $t_{e,i-1'}$  following the Local-Only model. The formulas [11] and [13]  
 672 are rewritten as

$$673 \quad t_{e,i} = (1 - W_{i-1})t_{e,i'} + W_{i-1}t_{r,i-1} \quad [11]$$

$$674 \quad W_{i-1} = \frac{\sigma_i^2}{\sigma_i^2 + \sigma_{i-1}^2 + (t_{e,i'} - t_{e,i-1'})^2} \quad [12]$$

675

676

677 Bayes Updating model

678 We also considered two unitary process models in which a global prior is updated in a dynamic manner.  
 679 For the Bayes Updating model, the prior is updated following Bayes rule after each observation. Since the  
 680 prior and likelihood are Gaussian, this model can be expressed as a Kalman filter. On each trial, the  
 681 estimated duration ( $t_e$ ) is a weighted sum of  $t_o$  and the duration of the stimulus ( $t_s$ ).

$$682 \quad t_e = (1 - w) * t_o + w * t_s \quad [13]$$

683 where the weight  $w$  is determined by the perceptual noise and variance of the prior. As such, as  $w$   
 684 increases, the weight given to the prior will increase (i.e., attraction to central tendency). Participants  
 685 make a motor response based on  $t_e$  with Gaussian motor noise (see equation [5]). Given that Experiment

686 2 showed that serial dependence is primarily induced by the reproduction component rather than the  
687 perceptual component, we assumed the prior is updated according to  $t_r$ . After the motor response,  $t_0$  is  
688 updated based on  $t_r$  following another Kalman filter:

$$689 \quad t'_0 = (1 - k) * t_0 + k * t_r \quad [14]$$

690 where  $t'_0$  is the new reference point for the next trial, and  $k$  represents the learning rate. To address the  
691 scalar property of timing noise (Weber law),  $t_r$ ,  $t_s$ ,  $t_e$ , and  $t_0$  are taken to be the log value of the respective  
692 durations. Note, that an alternative version of this model could have the observer directly use the  
693 posterior as a new prior (what is known as a fully iterative model). However, as with the Local-Only model,  
694 a fully iterative model will largely overestimate serial dependence given a reasonable central tendency  
695 effect.

696

697 Mixed-Gaussian Updating model

698 In a second unitary model, the prior is represented as a Gaussian mixture model. This model is identical  
699 to the Global-Only model (equation [1-5]) except that the prior is updated after each trial to generate a  
700 better estimate of the temporal context. We applied a simple updating rule here, in which the observer  
701 adds a normal distribution centered at  $t_r$  with a standard deviation of  $v_p$  to the old test set. The posterior  
702 is then appropriately normalized:

$$703 \quad \pi'(t_s) = \frac{\pi(t_s) + r * N(t_s | t_r, v_p)}{\int [\pi(t_s) + r * N(t_s | t_r, v_p)] dt_s} \quad [15]$$

704 where  $\pi'(t_s)$  is the new test set, and  $r$  is the learning rate.

705

706 Simulation procedure.

707 Simulations of each model were conducted to evaluate the results of Experiment 1. The data from 100  
708 pseudo-participants were generated for each simulation. To determine the values of the free parameters  
709 for the simulations, we referred to a previous study that used a similar design to that employed here and  
710 evaluated the results with the BLS model, or what we refer to as the Global-Only model (6). Based on their  
711 results, we set  $n_p = 0.10$  and  $n_m = 0.06$  for the Global-Only, MGU, and DP models. Other parameters were  
712 determined to make the amplitude of the serial dependence function roughly similar to the behavioral  
713 results. Specifically, we set  $w = 0.7$  and  $k = 0.3$  for the BU model, the learning rate  $r = 0.3$  for the MGU  
714 model, and  $K = 0.06$  for the Local-Only and DP models. We designed Experiments 3 and 4 to focus on the  
715 MGU and DP models, the two models that produce both central tendency and non-linear serial  
716 dependence effects. For simulations of the short conditions, the step between every two adjacent stimuli

717 was the same as what was used in the other experiments (40 ms). For simulations of the medium and the  
718 long conditions, the step size was set to a smaller value (70 ms) than used in the experiments to improve  
719 resolution. The parameters  $n_p$  and  $n_m$  were fixed at the values used in the previous simulations, while a  
720 series of  $r$  and  $K$  values were tested.

721

722 Data and code availability

723 Data for this paper and codes for analyses are available at <https://osf.io/2dz7k/>

724

#### 725 **Author Contributions**

726 T.W. designed research; T.W. and Y.L. performed research; T.W. analyzed data; T.W. prepared Figures;  
727 T.W., Y.L., E.P., Y.B., J.S.T, and R.B.I wrote the paper.

728

#### 729 **Competing Interest**

730 The authors declare no competing interests.

731

#### 732 **Acknowledgments**

733 This work was supported by the National Natural Science Foundation of China (31771213 and 31371018)  
734 to Yan Bao. We thank Linfeng Han, Jiashu Wang, and Huihui Zhang for valuable discussions.

735 **Reference**

- 736 1. R. B. Ivry, J. E. Schlerf, Dedicated and intrinsic models of time perception. *Trends Cogn. Sci.* **12**, 273–  
737 280 (7/2008).
- 738 2. E. Pöppel, A hierarchical model of temporal perception. *Trends Cogn. Sci.* **1**, 56–61 (5/1997).
- 739 3. Y. Bao, A. Szymaszek, X. Wang, A. Oron, E. Pöppel, E. Szélag, Temporal order perception of auditory  
740 stimuli is selectively modified by tonal and non-tonal language environments. *Cognition.* **129**, 579–  
741 585 (2013).
- 742 4. H. Lejeune, J. H. Wearden, Vierordt's *The Experimental Study of the Time Sense* (1868) and its legacy.  
743 *Eur. J. Cogn. Psychol.* **21**, 941–960 (09/2009).
- 744 5. Vierordt: Der Zeitsinn nach Versuchen - Google Scholar, (available at  
745 [https://scholar.google.com/scholar\\_lookup?hl=en&publication\\_year=1868&author=K.+Vierordt&title=+Der+Zeitsinn+nach+Versuchen+](https://scholar.google.com/scholar_lookup?hl=en&publication_year=1868&author=K.+Vierordt&title=+Der+Zeitsinn+nach+Versuchen+)).
- 746
- 747 6. M. Jazayeri, M. N. Shadlen, Temporal context calibrates interval timing. *Nat. Neurosci.* **13**, 1020–  
748 1026 (8/2010).
- 749 7. G. C. Ganzenmüller, S. Hiermaier, M. May, Improvements to the prototype micro-brittle linear  
750 elasticity model of Peridynamics. *arXiv [physics.comp-ph]* (2013), (available at  
751 <http://arxiv.org/abs/1312.5543>).
- 752 8. J. H. Wearden, L. A. Jones, Is the Growth of Subjective Time in Humans a Linear or Nonlinear Function  
753 of Real Time? *Q. J. Exp. Psychol.* **60**, 1289–1302 (09/2007).
- 754 9. J. H. Wearden, H. Lejeune, Scalar Properties in Human Timing: Conformity and Violations. *Q. J. Exp.*  
755 *Psychol.* **61**, 569–587 (04/2008).
- 756 10. K. M. Bausenhart, O. Dyjas, R. Ulrich, Temporal reproductions are influenced by an internal  
757 reference: Explaining the Vierordt effect. *Acta Psychol.* **147**, 60–67 (03/2014).
- 758 11. O. Dyjas, K. M. Bausenhart, R. Ulrich, Trial-by-trial updating of an internal reference in discrimination  
759 tasks: Evidence from effects of stimulus order and trial sequence. *Atten. Percept. Psychophys.* **74**,  
760 1819–1841 (11/2012).
- 761 12. K. M. Bausenhart, D. Bratzke, R. Ulrich, Formation and representation of temporal reference  
762 information. *Current Opinion in Behavioral Sciences.* **8**, 46–52 (04/2016).
- 763 13. J. Fischer, D. Whitney, Serial dependence in visual perception. *Nat. Neurosci.* **17**, 738–743 (5/2014).
- 764 14. M. Manassi, D. Whitney, Illusion of visual stability through active perceptual serial dependence. *Sci.*  
765 *Adv.* **8**, eabk2480 (2022).
- 766 15. K. P. Körding, D. M. Wolpert, Bayesian integration in sensorimotor learning. *Nature.* **427**, 244–247  
767 (2004).

- 768 16. H. Sohn, M. Jazayeri, Validating model-based Bayesian integration using prior–cost metamers. *of the*  
769 *National Academy of Sciences* (2021) (available at  
770 <https://www.pnas.org/content/118/25/e2021531118.short>).
- 771 17. M. Berniker, M. Voss, K. Kording, Learning Priors for Bayesian Computations in the Nervous System.  
772 *PLoS One*. **5**, e12686 (2010).
- 773 18. A. Liberman, J. Fischer, D. Whitney, Serial Dependence in the Perception of Faces. *Curr. Biol.* **24**,  
774 2569–2574 (11/2014).
- 775 19. A. Kiyonaga, J. M. Scimeca, D. P. Bliss, D. Whitney, Serial Dependence across Perception, Attention,  
776 and Memory. *Trends Cogn. Sci.* **21**, 493–497 (07/2017).
- 777 20. Z. Shi, D. Burr, Predictive coding of multisensory timing. *Current Opinion in Behavioral Sciences.* **8**,  
778 200–206 (04/2016).
- 779 21. N. W. Roach, P. V. McGraw, D. J. Whitaker, J. Heron, Generalization of prior information for rapid  
780 Bayesian time estimation. *Proc. Natl. Acad. Sci. U. S. A.* **114**, 412–417 (2017).
- 781 22. G. M. Cicchini, G. Anobile, D. C. Burr, Compressive mapping of number to space reflects dynamic  
782 encoding mechanisms, not static logarithmic transform. *Proceedings of the National Academy of*  
783 *Sciences.* **111**, 7867–7872 (2014).
- 784 23. S. Glasauer, Z. Shi, Individual beliefs about temporal continuity explain variation of perceptual biases.  
785 *Sci. Rep.* **12**, 10746 (2022).
- 786 24. G. T. Finnerty, M. N. Shadlen, M. Jazayeri, A. C. Nobre, D. V. Buonomano, Time in Cortical Circuits.  
787 *Journal of Neuroscience.* **35**, 13912–13916 (2015).
- 788 25. M. Jazayeri, M. N. Shadlen, A Neural Mechanism for Sensing and Reproducing a Time Interval. *Curr.*  
789 *Biol.* **25**, 2599–2609 (2015).
- 790 26. D. Narain, E. D. Remington, C. I. D. Zeeuw, M. Jazayeri, A cerebellar mechanism for learning prior  
791 distributions of time intervals. *Nat. Commun.* **9**, 469 (12/2018).
- 792 27. Y. Murai, Y. Yotsumoto, Timescale- and Sensory Modality-Dependency of the Central Tendency of  
793 Time Perception. *PLoS One.* **11**, e0158921 (2016).
- 794 28. M. Manassi, A. Liberman, A. Kosovicheva, K. Zhang, D. Whitney, Serial dependence in position occurs  
795 at the time of perception. *Psychon. Bull. Rev.* **25**, 2245–2253 (12/2018).
- 796 29. D. Pascucci, G. Mancuso, E. Santandrea, C. Della Libera, G. Plomp, L. Chelazzi, Laws of concatenated  
797 perception: Vision goes for novelty, decisions for perseverance. *PLoS Biol.* **17**, e3000144 (2019).
- 798 30. L. Acerbi, D. M. Wolpert, S. Vijayakumar, Internal Representations of Temporal Statistics and  
799 Feedback Calibrate Motor-Sensory Interval Timing. *PLoS Comput. Biol.* **8**, e1002771 (2012).
- 800 31. J. J. Wehrman, J. H. Wearden, P. Sowman, Short-term effects on temporal judgement: Sequential  
801 drivers of interval bisection and reproduction. *Acta Psychol.* . **185**, 87–95 (04/2018).

- 802 32. D. Yon, R. Edey, R. B. Ivry, C. Press, Time on your hands: Perceived duration of sensory events is  
803 biased toward concurrent actions. *J. Exp. Psychol. Gen.* **146**, 182–193 (02/2017).
- 804 33. M. Fritsche, E. Spaak, F. P. de Lange, A Bayesian and efficient observer model explains concurrent  
805 attractive and repulsive history biases in visual perception. *Elife*. **9** (2020), doi:10.7554/eLife.55389.
- 806 34. F. Sierra, D. Poeppel, A. Tavano, “A bias generating temporal distortions in serial perception”  
807 (Neuroscience, 2021), (available at <http://biorxiv.org/lookup/doi/10.1101/2021.10.08.463190>).
- 808 35. A. Breska, R. B. Ivry, “The human cerebellum is essential for modulating perceptual sensitivity based  
809 on temporal expectations” (Neuroscience, 2021), (available at  
810 <http://biorxiv.org/lookup/doi/10.1101/2021.01.15.426903>).
- 811 36. R. B. Ivry, R. M. C. Spencer, The neural representation of time. *Curr. Opin. Neurobiol.* **14**, 225–232  
812 (04/2004).
- 813 37. M. Kleiner, D. Brainard, D. Pelli, A. Ingling, R. Murray, C. Broussard, What’s new in psychtoolbox-3.  
814 *Perception*. **36**, 1–16 (2007).
- 815 38. W. J. Matthews, Stimulus Repetition and the Perception of Time: The Effects of Prior Exposure on  
816 Temporal Discrimination, Judgment, and Production. *PLoS One*. **6**, e19815 (2011).
- 817 39. W. J. Matthews, A. I. Gheorghiu, Repetition, expectation, and the perception of time. *Current*  
818 *Opinion in Behavioral Sciences*. **8**, 110–116 (04/2016).
- 819 40. J. J. New, B. J. Scholl, Subjective time dilation: Spatially local, object-based, or a global visual  
820 experience? *J. Vis.* **9**, 4–4 (2009).
- 821 41. V. Pariyadath, D. Eagleman, The Effect of Predictability on Subjective Duration. *PLoS One*. **2**, e1264  
822 (2007).
- 823



824

## Supplementary information

825

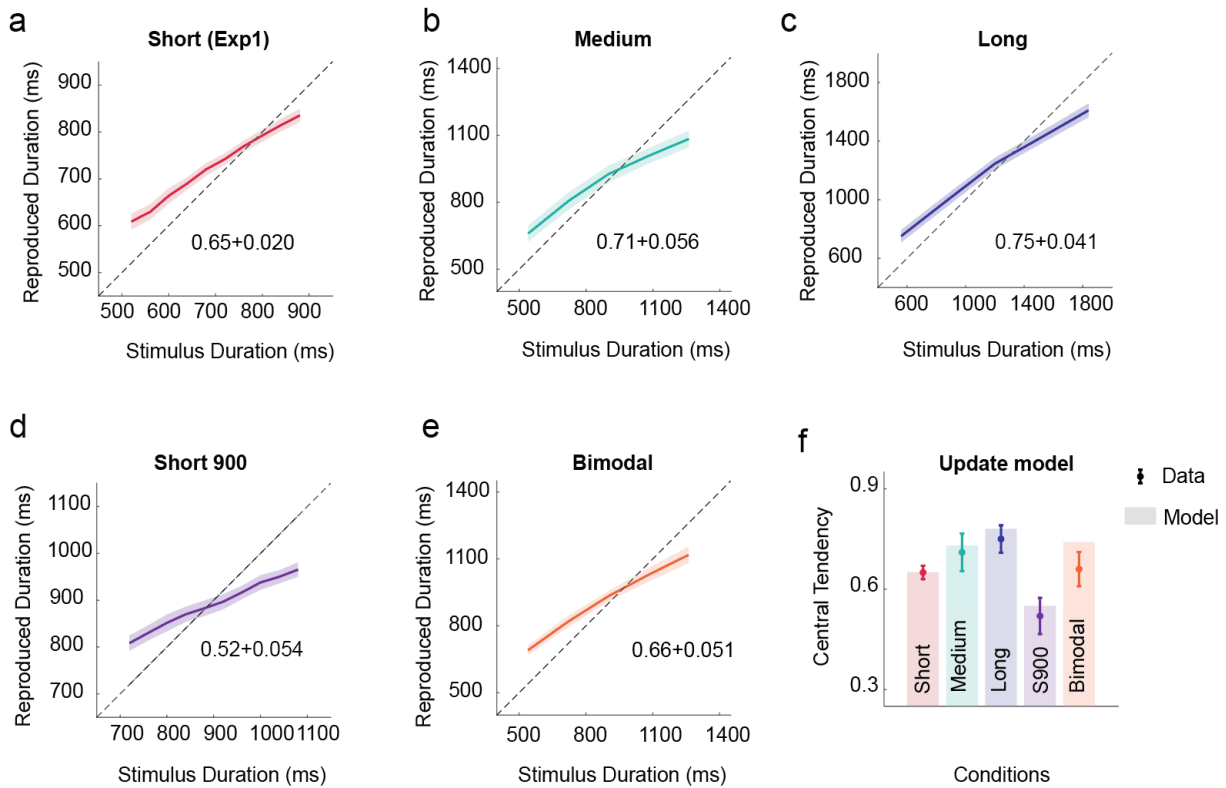

826

827 Figure S1. Central tendency of the reproduced duration as predicted by the MGU model in all experiments.

828 (a-e) Reproduced duration is plotted as a function of the target duration for Experiments 1, 3, & 4.

829 The shaded area indicates S.E. The median slope  $\pm$  S.E. is reported on each figure. (f) The predicted slopes for

830 the central tendency of the MGU model provide a good fit to the data. The dots and error bars indicate

831 median slope  $\pm$  S.E.

832

833

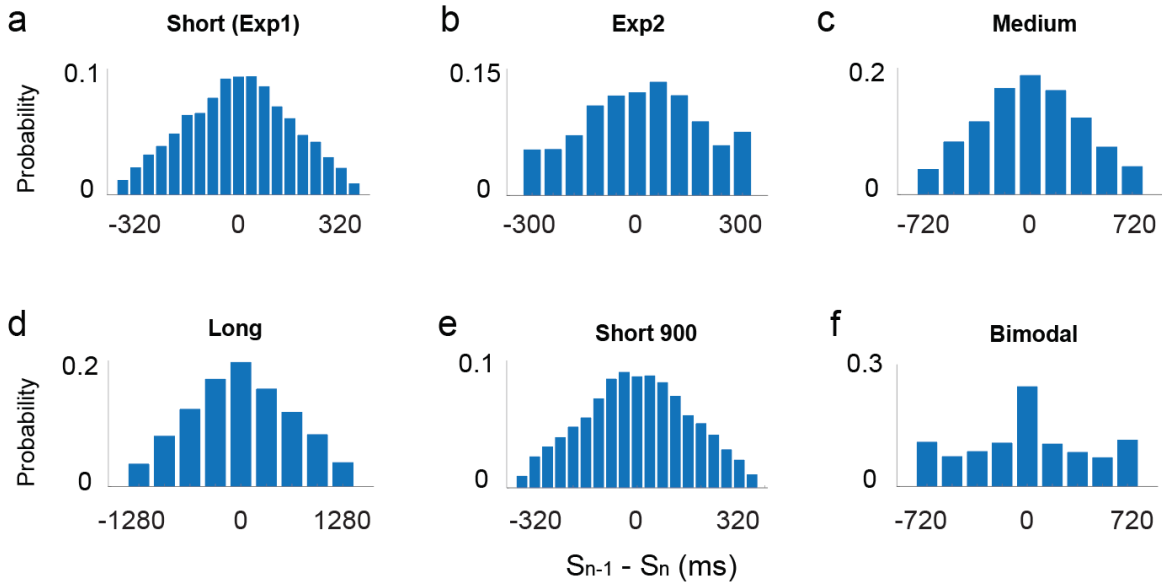

834

835 Figure S2. Histogram of the difference between the previous target duration ( $S_{n-1}$ ) and the current target

836 duration ( $S_n$ ). For individual participants, there are few trials with a large difference between stimuli,

837 especially for experiment 1 and the short-900 condition. As such, the DoG may not provide a good fit

838 when used to estimate serial dependence curves at the individual level.

839

840

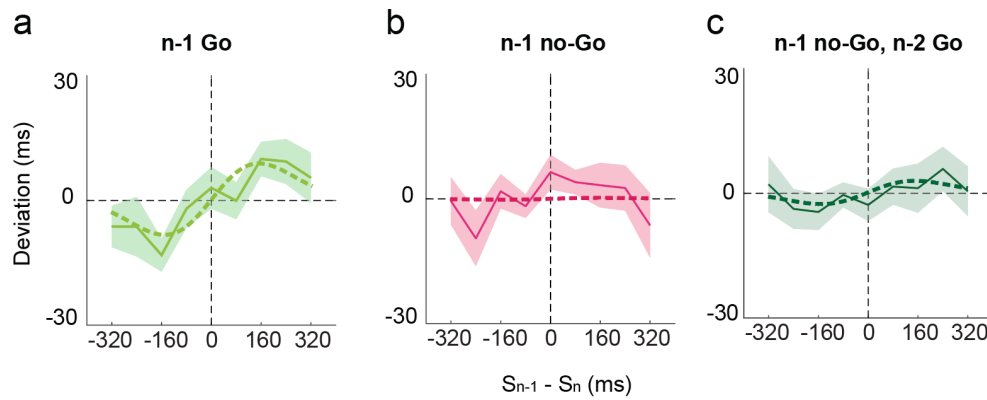

841

842 Figure S3. Deviation index functions for Experiment 2. (a) A prominent DoG curve can be seen for the n-1

843 data when trial n-1 was a Go trial. (b) This curve is markedly attenuated when trial n-1 was a no-Go trial.

844 (c) A small DoG curve is evident for the n-2 trial when n-1 was a No-Go trial and n-2 was a Go trial. The

845 thick dashed line is the best-fitted DoG curve. Shaded areas indicate standard error.

846

847

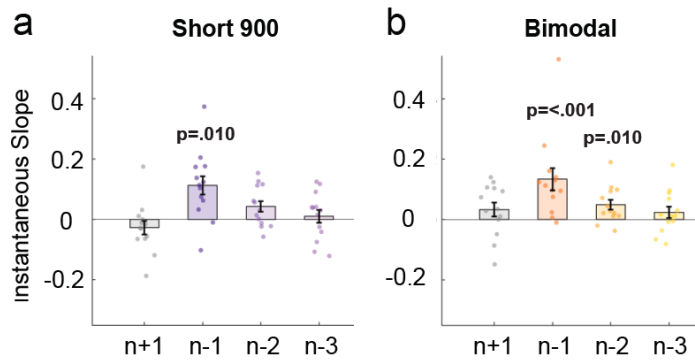

848

849 Figure S4. Instantaneous slope of the fitted DoG functions for trials n-1, n-2, n-3, and future (n+1) trials in  
850 the short-900 (a) and bimodal conditions (b). A significant serial dependence effect can be observed from  
851 the n-2 trial in the bimodal condition rather than the short-900 condition in experiment 4. Dots indicate  
852 individual data points and error bars represent standard error. The p-values are based on a test of whether  
853 the observed values differ from zero.

854
